# Supplementary material for: Alterations in Cerebellar Microtubule Cytoskeletal Network in a ValproicAcid-Induced Rat Model of Autism Spectrum Disorders
Source: MDPI journal article supplement (doi:10.3390/biomedicines10123031), 2022-11-24
Supplement: s1 [file s1]

Supplementary Materials:

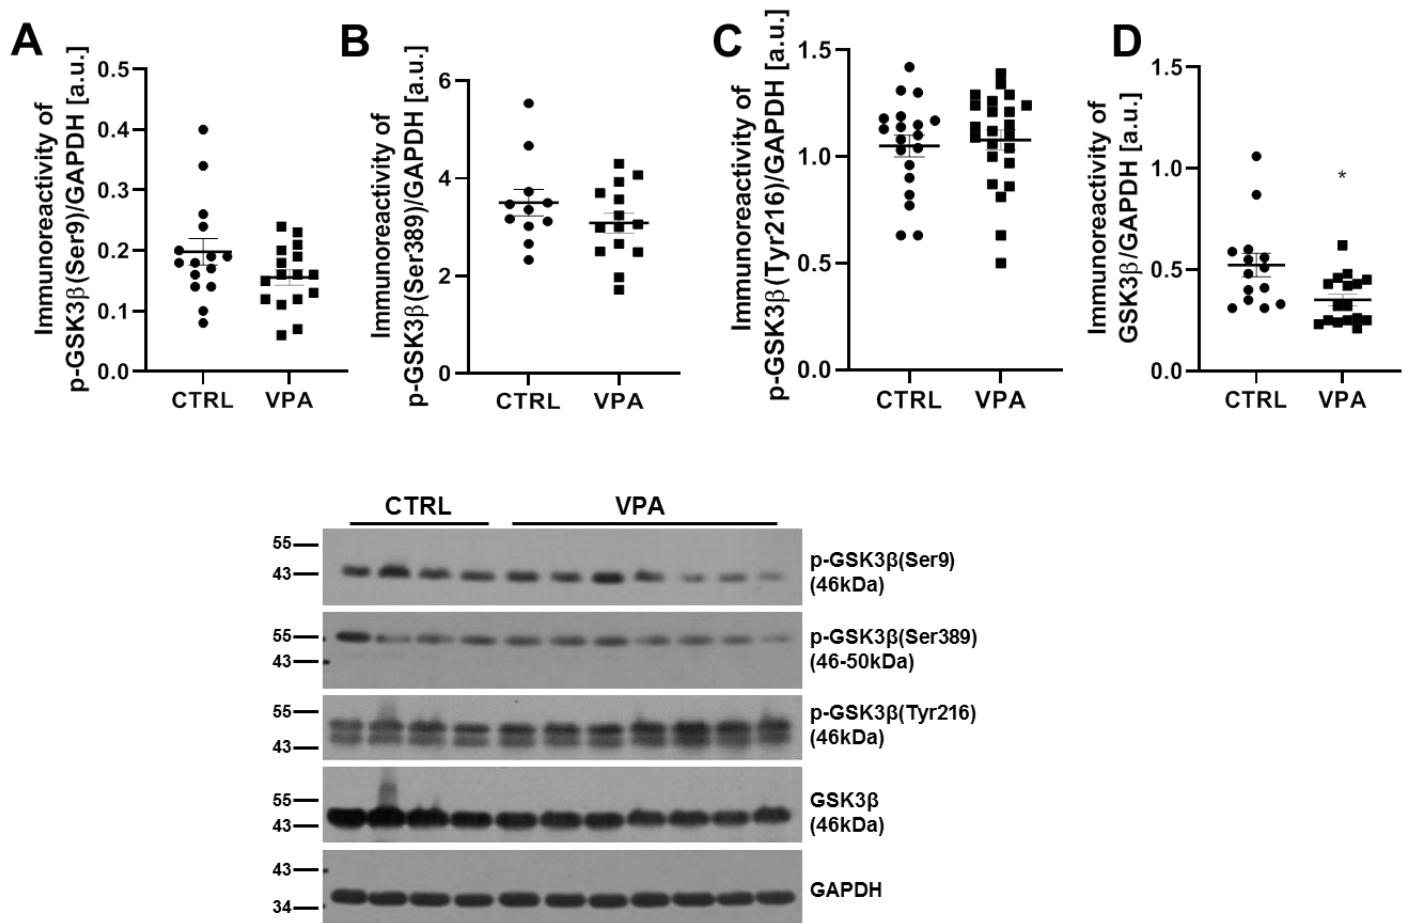

**Supplementary Figure S1. The effect of prenatal exposure to VPA on the GSK-3β in the cerebellum of adolescent rat offspring.** The phosphorylation status of GSK-3β at (Ser9), (Ser389) and (Tyr216) as well as the immunoreactivity of total GSK-3β in control and VPA-exposed rats were monitored using Western blot analysis. Densitometric analysis and representative pictures of pGSK-3β(Ser9) (A), pGSK-3β(Ser389) (B), pGSK-3β(Tyr216) (C) and total GSK-3β (D) in the cerebellum are shown. Results were normalised to GAPDH levels. Data represent the means ± S.E.M. from n=(10-16) independent experiments. \*  $p < 0.5$ , \*\*\*  $p < 0.001$ , vs. control.

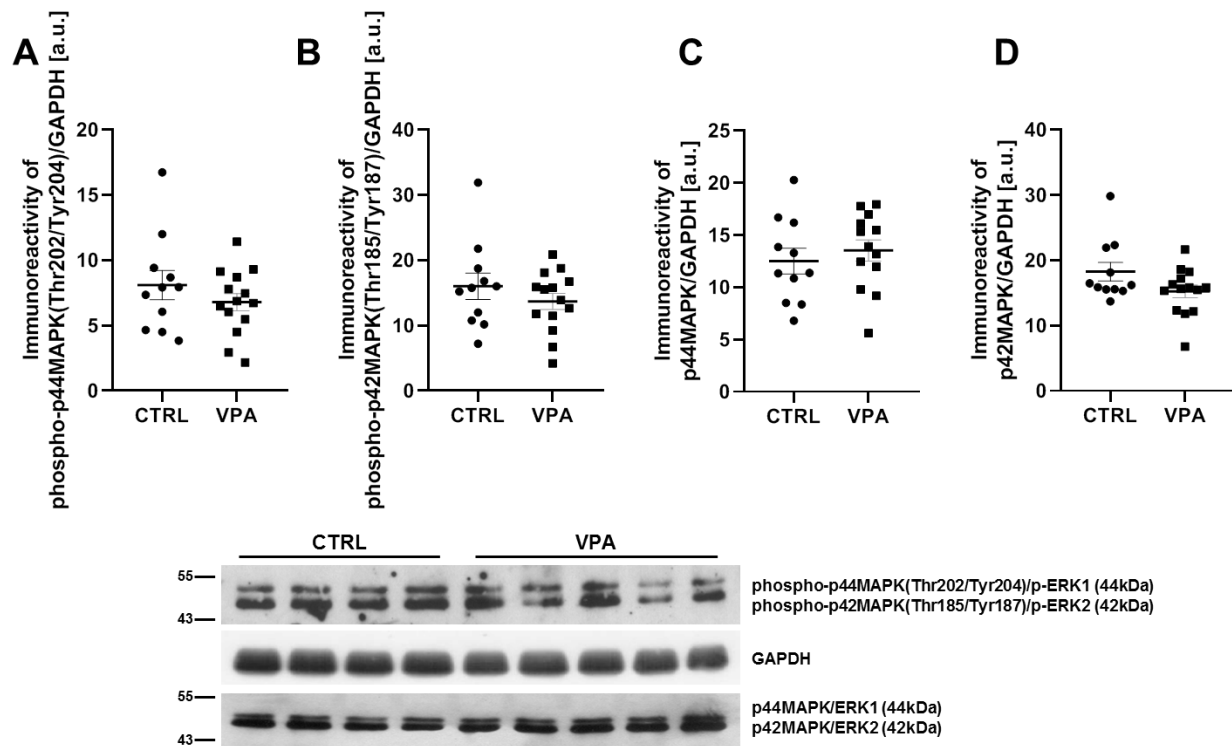

**Supplementary Figure S2.** The effect of prenatal exposure to VPA on the p44/p42MAPK (ERK1/2) in the cerebellum of adolescent rat offspring. Immunoreactivity of phospho-ERK1(Thr202/Tyr204), phospho-ERK2(Thr185/Tyr187), ERK1 and ERK2 were monitored using Western blot analysis. Densitometric analysis and representative pictures of phospho-ERK1, phospho-ERK2 (**A**, **B**) as well as total ERK1 and ERK2 (**C**, **D**) in the cerebellum are shown. Results were normalised to GAPDH levels. Data represent the means  $\pm$  S.E.M. from  $n=(11-14)$  independent experiments.

### Supplementary Results

GSK-3 $\beta$  activity was evaluated by measurement of the phosphorylation status at (Ser9) and (Ser389), which are molecular marks of deactivation of GSK-3 $\beta$  as well as (Tyr216), associated with an increase in GSK-3 $\beta$  activity. Moreover, its protein level was evaluated. As presented in Figure 1, the immunoreactivity of p-GSK-3 $\beta$ (Ser9) remained unchanged (**Figure 1A**), just like p-GSK-3 $\beta$ (Ser389) levels (**Figure 1B**) in the cerebellum of VPA offspring. Also, no changes in the level of p-GSK-3 $\beta$ , phosphorylated at (Tyr216) were observed in the VPA animals, compared to control (**Figure 1C**). In addition, the level of GSK-3 $\beta$  was significantly decreased (by about 33%,  $p=0.0121$ ) in the cerebellum of VPA-exposed animals (**Figure 1D**). All the above data indicate no effect of VPA exposure on GSK-3 $\beta$  activity in the cerebellum of the offspring. Thus, the data indicate GSK-3 $\beta$ -independent Tau hyperphosphorylation induced by VPA.

To study the possible involvement of mitogen-activated protein kinases: ERK1 and ERK2 in VPA-evoked Tau phosphorylation, we analysed the level of phosphorylated p44MAPK (p-ERK1) at (Thr202/Tyr204), p42MAPK (p-ERK2) at (Thr185/Tyr187) as well as the level of total p44/42MAPK (ERK1/2). Our study revealed that exposure to VPA during embryonic development had no effect on the level of p-ERK1 and p-ERK2 in the cerebellum (**Figure 2A** and **B**). Analysis of the expression of total ERK1/2 also revealed the lack of changes in the protein level of ERK1/2 in this brain structure of animals exposed to VPA (**Figure 2C** and **D**). The data indicate ERK1/2-independent Tau hyperphosphorylation evoked by VPA administration.

**Table S1.** Experimental conditions used to perform the Western blot experiments.

| <b><u>Primary antibody</u></b>           | <b><u>Brand/cat #</u></b>                                                | <b><u>Dilution</u></b>           |
|------------------------------------------|--------------------------------------------------------------------------|----------------------------------|
| Rabbit anti- $\alpha/\beta$ -tubulin     | Cell Signalling<br>#2148S                                                | 1:1000<br>5% BSA in TBS-T 0.1%   |
| Mouse anti- Tau                          | Santa Cruz Biotechnology<br>sc-32274                                     | 1:500<br>5% milk in TBS-T 0.1%   |
| Mouse anti- pTau(Ser396)                 | Cell Signalling<br>#9632                                                 | 1:250<br>TBS-T 0.1%              |
| Rabbit anti- pTau(Ser199/202)            | Sigma-Aldrich<br>T6819                                                   | 1:1000<br>5% milk in TBS-T 0.1%  |
| Rabbit anti- pTau(Ser416)                | Cell Signalling<br>#15013P                                               | 1:1000<br>5% milk in TBS-T 0.1%  |
| Mouse anti- pGSK-3 $\beta$ (Ser9)        | Santa Cruz Biotechnology<br>sc-373800                                    | 1:250<br>5% milk in TBS-T 0.1%   |
| anti- pGSK-3 $\beta$ (Ser389)            | Proteintech<br>14850-1-AP                                                | 1:500<br>5% milk in TBS-T 0.1%   |
| Mouse anti- pGSK-3 $\beta$ (Tyr216)      | BD Diagnostic<br>612313                                                  | 1:250<br>0.1% BSA in TBS-T 0.1%  |
| Rabbit anti- GSK-3 $\beta$               | Cell Signalling<br>#9315                                                 | 1:1000<br>5% milk in TBS-T 0.1%  |
| Mouse anti- pp44/pp42MAPK(Thr202/Tyr204) | Cell Signalling<br>#9106                                                 | 1:1000<br>TBS-T 0.1%             |
| Mouse anti- p44/p42MAPK                  | Cell Signalling<br>#4696                                                 | 1:1000<br>5% milk in TBS-T 0.1%  |
| Rabbit anti- p35/p25                     | Cell Signalling<br>#2680 and<br>Santa Cruz Biotechnology<br>sc-820 (Mix) | 1:1000<br>1% BSA in TBS-T 0.1%   |
| Mouse anti- $\alpha$ II-spectrin         | Santa Cruz<br>Biotechnology<br>sc-46696                                  | 1:1000<br>5% milk in TBS-T 0.1%  |
| Rabbit anti- p-AMPK(Thr172)              | Cell Signalling<br>#50081                                                | 1:500<br>TBS-T 0.1%              |
| Rabbit anti- AMPK                        | Cell Signalling<br>#5831                                                 | 1:500<br>TBS-T 0.1%              |
| Mouse anti- MAP1B                        | Santa Cruz<br>Biotechnology<br>Sc-365668                                 | 1:500<br>1% BSA in TBS-T 0.1%    |
| Rabbit anti- MAP2                        | Cell Signalling<br>#8707S                                                | 1:1000<br>5% BSA in TBS-T 0.1%   |
| Rabbit anti- p-MAP2(Ser136)              | Cell Signalling<br>#4541S                                                | 1:1000<br>5% BSA in TBS-T 0.1%   |
| Mouse anti- MAP6 (STOP)                  | Santa Cruz<br>Biotechnology<br>sc-137036                                 | 1:250<br>5% milk in TBS-T 0.1%   |
| Mouse anti- NF-L                         | Santa Cruz<br>Biotechnology<br>sc-20012                                  | 1:125<br>5% milk in TBS-T 0.1%   |
| Rabbit anti- GAPDH                       | Sigma-Aldrich<br>G9545-200UL                                             | 1:50000<br>5% milk in TBS-T 0.1% |
| Rabbit anti- vinculin                    | Cell Signalling<br>#13901                                                | 1:1000<br>5% milk in TBS-T 0.1%  |
| <b><u>Secondary antibody</u></b>         | <b><u>Brand/cat #</u></b>                                                | <b><u>Dilution</u></b>           |
| anti-mouse IgG                           | GE Healthcare<br>VXA931V                                                 | 1:4000<br>5% milk in TBS-T 0.1%  |

|                 |                            |                                 |
|-----------------|----------------------------|---------------------------------|
| anti-rabbit IgG | Sigma-Aldrich<br>A0545-1ML | 1:8000<br>5% milk in TBS-T 0.1% |
|-----------------|----------------------------|---------------------------------|
